# Supplementary material for: Structure and stability of CaH2surfaces: on the possibility of electron-rich surfaces in metal hydrides for catalysis
Source: Royal Society of Chemistry journal article supplement (doi:10.1039/c6ta09561e), 2017-01-01
Supplement: c6ta09561e1.pdf [file c6ta09561e1.pdf]

# Supporting Information

## Structure and stability of $\text{CaH}_2$ surfaces: on the possibility of electron-rich surfaces in metal hydrides for catalysis

Phuong Vu Ong,<sup>\*,†</sup> Lewis E. Johnson,<sup>†</sup> Hideo Hosono,<sup>\*,‡</sup> and Peter V. Sushko<sup>†</sup>

<sup>†</sup>*Physical Sciences Division, Physical & Computational Sciences Directorate, Pacific  
Northwest National Laboratory, Richland, WA 99352, U.S.A.*

<sup>‡</sup>*Materials Research Center of Element Strategy, Tokyo Institute of Technology, 4259  
Nagatsuta, Midori-ku, Yokohama 226-8053, Japan*

E-mail: [phuong-vu.ong@pnnl.gov](mailto:phuong-vu.ong@pnnl.gov); [hosono@msl.titech.ac.jp](mailto:hosono@msl.titech.ac.jp)

### A. Structure of $\text{CaH}_2$

Figure S1 (A), (B) and (C) display different choices of  $\text{CaH}_2$  unit cells where  $c$ -axis parallel to  $[001]$ ,  $[110]$ , and  $[111]$  crystallographic orientations, respectively. These unit-cell structures make it convenient to create surfaces by axial scanning method. Slabs with all possible terminations can then be generated by axial scanning and cleaving the bulk crystal along  $[001]$ ,  $[110]$  and  $[111]$  crystallographic axes.

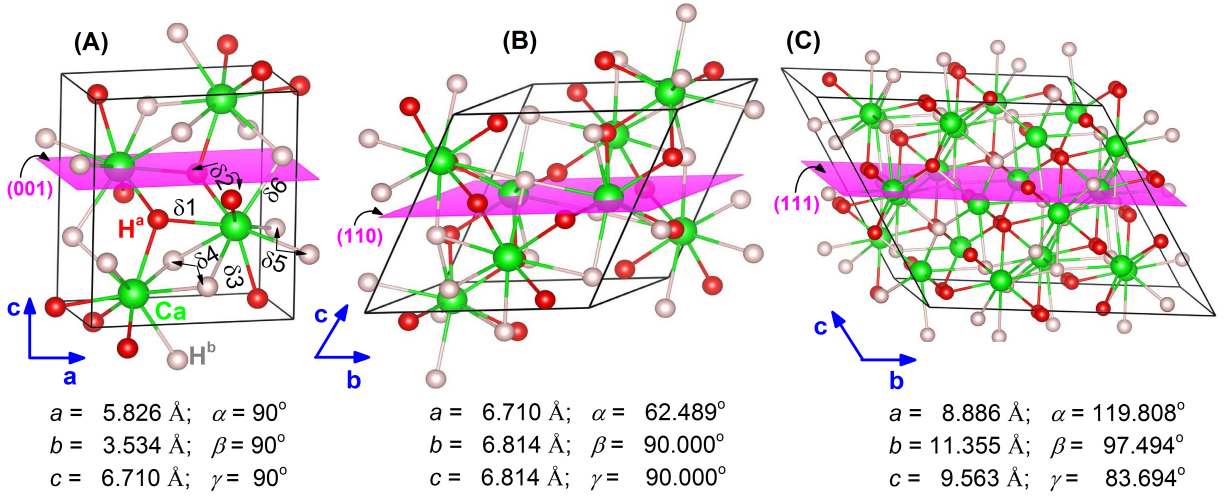

Figure S1: (A), (B) and (C) Different choices of cell of  $\text{CaH}_2$  where  $c$ -axis parallel to  $[001]$ ,  $[110]$ , and  $[111]$  crystallographic orientations, respectively. The shaded area indicate  $(001)$ ,  $(110)$ , and  $(111)$  lattice planes, respectively. Sticks connecting a Ca to its nearest neighbor H atoms. Two sets of symmetrically inequivalent hydrogens are denoted by  $\text{H}^a$  and  $\text{H}^b$ . Ca- $\text{H}^a$  bond lengths:  $\delta 1 = 2.265 \text{ \AA}$ ,  $\delta 2 = 2.225 \text{ \AA}$  (two bonds), and  $\delta 3 = 2.267 \text{ \AA}$ ; Ca- $\text{H}^b$  bond lengths:  $\delta 4 = 2.568 \text{ \AA}$  (two bonds),  $\delta 5 = 2.461 \text{ \AA}$  (two bonds), and  $\delta 6 = 2.391 \text{ \AA}$ .

### B. Doubly-occupied vacancy band on a $\text{CaH}_2$ surface

To demonstrate that a surface vacancy can accommodate an additional electron transferred from a nearby  $\text{H}^-$ , we constructed  $(111)$  slabs with a neutral hydrogen vacancy and a Ne substitution for a surface hydrogen. As Ne is an inert gas element, the extra electron (otherwise transferred to the substituted H to form  $\text{H}^-$ ) will be transferred to the vacancy site,

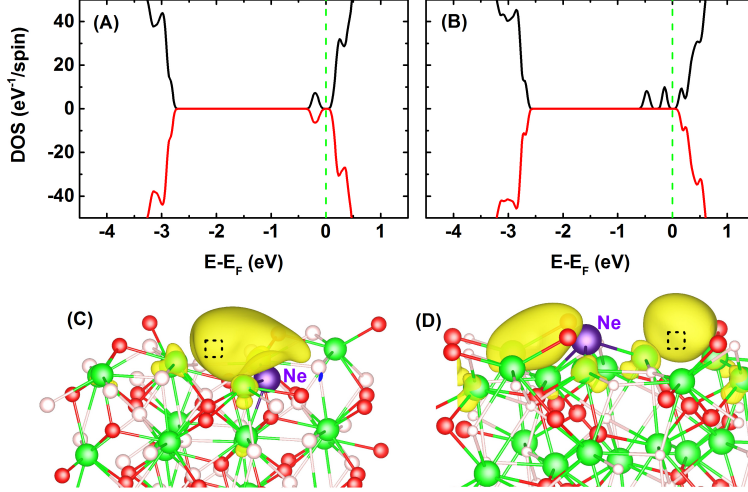

Figure S2: Total density of states (DOS) for a (111) slab containing a neutral hydrogen vacancy and a Ne substitution for a surface hydrogen nearby (A) and further from (B) the vacancy. (C) and (D) surfaces of the constant charge density for electrons occupying the gap states in (A) and (B), respectively. The dotted squares indicate positions of hydrogen vacancies.

form a new confined electron at a different site, or become delocalized. We found that when the Ne ion is close enough to the hydrogen vacancy, the extra electron is localized in the vacancy site and spin-paired with the vacancy-induced electron in the same vacancy band [Figure S2 (A) and (C)]. On the other hand, if the Ne is far enough from the vacancy, the extra electron is localized nearby the Ne and has the same spin as the vacancy-induced one [Figure S2 (B) and (D)]. The same conclusions have been reached when He, instead of Ne, was used as a substitute for the surface hydrogen.

### C. Equation for Gibbs free energy of CaH<sub>2</sub> surface and boundary conditions

*Gibbs free energy of surface* – Consider a CaH<sub>2</sub> slab with  $N_{\text{Ca}}^s$  and  $N_{\text{H}}^s$  being the numbers of Ca and H, respectively. The Gibbs free energy of the surface is defined as,

$$\Omega^s = G_{\text{slab}}^s - N_{\text{Ca}}^s \mu_{\text{Ca}} - N_{\text{H}}^s \mu_{\text{H}} \quad (1)$$

where  $G_{\text{slab}}^s$  is Gibbs free energy of the CaH<sub>2</sub> slab and  $\mu_{\text{Ca}}$  and  $\mu_{\text{H}}$  are chemical potentials of Ca and H ions in the CaH<sub>2</sub> slab, respectively. If the surface is in equilibrium with bulk

CaH<sub>2</sub> reservoir, the sum of the chemical potentials is constrained to be equal to chemical potential  $\mu_{\text{CaH}_2}$  of the bulk CaH<sub>2</sub>

$$\mu_{\text{CaH}_2} = N_{\text{Ca}}^b \mu_{\text{Ca}} + N_{\text{H}}^b \mu_{\text{H}} \quad (2)$$

where  $N_{\text{Ca}}^b$  and  $N_{\text{H}}^b$  are the numbers of Ca and H, respectively, in the bulk. Therefore, using equation (2) we can eliminate  $\mu_{\text{Ca}}$  in equation (1). Then the expression of  $\Omega$  becomes

$$\Omega^s = G_{\text{slab}}^s - \frac{N_{\text{Ca}}^s}{N_{\text{Ca}}^b} \mu_{\text{CaH}_2} - \left( N_{\text{H}}^s - N_{\text{Ca}}^s \frac{N_{\text{H}}^b}{N_{\text{Ca}}^b} \right) \mu_{\text{H}} \quad (3)$$

Put

$$\Gamma_{\text{Ca,H}}^s = N_{\text{H}}^s - N_{\text{Ca}}^s \frac{N_{\text{H}}^b}{N_{\text{Ca}}^b} \quad (4)$$

A positive or negative value of  $\Gamma_{\text{Ca,H}}^s$  indicates an excess or deficit, respectively, of H ions with respect to Ca ones in the CaH<sub>2</sub> slab. Therefore, a surface corresponding to positive, negative, or zero  $\Gamma_{\text{Ca,H}}^s$  is said to be hydrogen-rich, hydrogen-poor, or stoichiometric, respectively. Substituting  $\Gamma_{\text{Ca,H}}^s$  into the equation (3), we obtain

$$\Omega^s = G_{\text{slab}}^s - \frac{N_{\text{Ca}}^s}{N_{\text{Ca}}^b} \mu_{\text{CaH}_2} - \Gamma_{\text{Ca,H}}^s \mu_{\text{H}} \quad (5)$$

where we define

$$\mu_{\text{H}} = \frac{1}{2} E(\text{H}_2) + \Delta\mu_{\text{H}} \quad (6)$$

where  $\Delta\mu_{\text{H}}$  is variation of chemical potential of hydrogen atom with respect to half an energy of the molecular hydrogen  $E(\text{H}_2)$ . Substituting equation (6) into (5), we obtain

$$\Omega^s = \phi^s - \Gamma_{\text{H,Ca}}^s \Delta\mu_{\text{H}} \quad (7)$$



where

$$\phi^s = G_{slab}^s - \frac{N_{Ca}^s}{N_{Ca}^b} \mu_{CaH_2} - \frac{1}{2} \Gamma_{Ca,H}^s E(H_2) \quad (8)$$

The chemical potential  $\mu_{CaH_2}$  is nothing but the molar Gibbs free energy of the bulk  $CaH_2$

$$\mu_{CaH_2} = g_{CaH_2}^b \quad (9)$$

Therefore, equation (8) can be rewritten,

$$\phi^s = G_{slab}^s - \frac{N_{Ca}^s}{N_{Ca}^b} g_{CaH_2}^b - \frac{1}{2} \Gamma_{Ca,H}^s E(H_2) \quad (10)$$

In general, we have

$$g_{CaH_2}^b = E_{CaH_2}^{static} + E_{CaH_2}^{phonon} - TS_{CaH_2} + pV_{CaH_2} \quad (11)$$

where  $E_{CaH_2}^{static}$  and  $E_{CaH_2}^{phonon}$  are, respectively, static and vibrational components of the crystal energy;  $S_{CaH_2}$  is entropy; and  $V_{CaH_2}$  is volume;  $T$  and  $p$  are applied temperature and pressure of the system. Throughout the present work, we approximate the Gibbs free energy to the total energy obtained from *ab initio* calculation, *i.e.*,

$$g_{CaH_2}^b \approx E_{CaH_2}^{tot} \quad (12)$$

Similarly,

$$G_{slab}^s \approx E_{slab}^{tot} \quad (13)$$

Our estimation indicates that total contribution of the vibrational, entropic and mechanical terms is negligible. The above approximations result in an error of the order of  $10^{-2}$  J/m<sup>2</sup> in  $CaH_2$  surface energy.

*Boundary conditions* – To make the  $CaH_2$  phase stable, precipitation of Ca metal and condensation of hydrogen ions into hydrogen gas should be prevented. These conditions can

be expressed through relations of chemical potentials of the atomic constituents of  $\text{CaH}_2$ , *i.e.*,  $\mu_{\text{Ca}}$  and  $\mu_{\text{H}}$ , and the Gibbs free energies (*i.e.*, molar chemical potentials) of the undesired precipitated substances:

$$(i) \quad 2\mu_{\text{H}} \leq g_{\text{H}_2}^b \quad (14)$$

$$(ii) \quad \mu_{\text{Ca}} \leq g_{\text{Ca}}^b \quad (15)$$

From equation (6) and the approximations in equations (12) and (13), the condition (i) is equivalent to

$$(i) \quad \Delta\mu_{\text{H}} \leq 0 \quad (16)$$

The upper bound  $\Delta\mu_{\text{H}} = 0$  is called hydrogen-rich limit.

Similarly, we have

$$(ii) \quad \Delta\mu_{\text{Ca}} \leq 0 \quad (17)$$

From equation (2), we have

$$g_{\text{CaH}_2}^b = N_{\text{Ca}}^b (g_{\text{Ca}}^b + \Delta\mu_{\text{Ca}}) + N_{\text{H}}^b \left( \frac{1}{2} E(\text{H}_2) + \Delta\mu_{\text{H}} \right) \quad (18)$$

or

$$\Delta g_{\text{CaH}_2}^b = N_{\text{Ca}}^b \Delta\mu_{\text{Ca}} + N_{\text{H}}^b \Delta\mu_{\text{H}} \quad (19)$$

where

$$\Delta g_{\text{CaH}_2}^b = g_{\text{CaH}_2}^b - N_{\text{Ca}}^b g_{\text{Ca}}^b - \frac{1}{2} N_{\text{H}}^b E(\text{H}_2) \quad (20)$$

From the approximation in (12)

$$\Delta g_{\text{CaH}_2}^b \approx E_{\text{CaH}_2}^{\text{tot}} - N_{\text{Ca}}^b E_{\text{Ca}}^{\text{tot}} - \frac{1}{2} N_{\text{H}}^b E(\text{H}_2) \quad (21)$$

where  $E_{\text{Ca}}^{\text{tot}}$  is total energy per Ca atom.

From equations (17) and (19), we have

$$(ii) \quad \Delta\mu_H \geq \frac{1}{N_H^b} \Delta g_{CaH_2}^b \quad (22)$$

The lower bound  $\Delta\mu_H = \Delta g_{CaH_2}^b / N_H^b$  is called the hydrogen-poor limit. From *ab initio* calculations,  $E_{Ca}^{tot} = -2.000$  eV and  $E(H_2) = -6.770$  eV. For a  $8 \times 8$  bulk supercell, in which  $N_{Ca}^b = 32$  and  $N_H^b = 64$ , total energy calculation gave  $E_{CaH_2}^{tot} = -334.402$  eV. Therefore, the hydrogen-poor limit is  $\Delta\mu_H = -0.840$  eV. From (16) and the calculation above, the range of  $\Delta\mu_H$  is

$$-0.840 \leq \Delta\mu_H \leq 0 \quad (\text{in eV}) \quad (23)$$

#### D. Temperature and pressure dependence of chemical potential of hydrogen in $CaH_2$ slabs

In this part, we present the calculation of variation of chemical potential of hydrogen,  $\Delta\mu_H$ , in the  $CaH_2$  slab as a function of temperature and pressure.

We start from the Maxwell's relation

$$\left( \frac{\partial \mu_H}{\partial p_{H_2}} \right)_T = \frac{k_B T}{2} \frac{1}{p_{H_2}} \quad (24)$$

Its solution takes the form

$$\mu_H(T, p_{H_2}) = \mu_H(T, p_{H_2}^o) + \frac{k_B T}{2} \ln \frac{p_{H_2}}{p_{H_2}^o} \quad (25)$$

where standard state pressure  $p_{H_2}^o = 0.1$  MPa and  $k_B$  is Boltzmann's constant. We rewrite equation (25) as

$$\mu_H(T, p_{H_2}) = \mu_H(0K, p_{H_2}^o) + [\mu_H(T, p_{H_2}^o) - \mu_H(0K, p_{H_2}^o)] + \frac{k_B T}{2} \ln \frac{p_{H_2}}{p_{H_2}^o} \quad (26)$$

Oxygen in the  $\text{CaH}_2$  slab is in equilibrium with  $\text{H}_2$  gas. Therefore,

$$\mu_{\text{H}}(T, p_{\text{H}_2}) = \frac{1}{2}\mu_{\text{H}_2}(T, p_{\text{H}_2}) = \frac{1}{2}G_{\text{H}_2}^m(T, p_{\text{H}_2}) \quad (27)$$

where  $G_{\text{H}_2}^m(T, p_{\text{H}_2})$  is molar Gibbs free energy of  $\text{H}_2$  gas. Then the terms enclosed in [...] in equation (26) can be rewritten

$$\begin{aligned} \mu_{\text{H}}(T, p_{\text{H}_2}^{\circ}) - \mu_{\text{H}}(0\text{K}, p_{\text{H}_2}^{\circ}) &= \frac{1}{2} [G_{\text{H}_2}^m(T, p_{\text{H}_2}^{\circ}) - G_{\text{H}_2}^m(0\text{K}, p_{\text{H}_2}^{\circ})] \\ &\equiv \frac{1}{2}\Delta G_{\text{H}_2}^m(T, p_{\text{H}_2}^{\circ}) \end{aligned} \quad (28)$$

Using the relation  $G = H - TS$ , where  $H$  and  $S$  are enthalpy and entropy, respectively, we obtain

$$\begin{aligned} \Delta G_{\text{H}_2}^m(T, p_{\text{H}_2}^{\circ}) &= [H_{\text{H}_2}^m(T, p_{\text{H}_2}^{\circ}) - H_{\text{H}_2}^m(T_R, p_{\text{H}_2}^{\circ})] \\ &\quad - [H_{\text{H}_2}^m(0\text{K}, p_{\text{H}_2}^{\circ}) - H_{\text{H}_2}^m(T_R, p_{\text{H}_2}^{\circ})] \\ &\quad - TS_{\text{H}_2}^m(T, p_{\text{H}_2}^{\circ}) \end{aligned} \quad (29)$$

Equation (29) can then be separated as

$$A = [H_{\text{H}_2}^m(T, p_{\text{H}_2}^{\circ}) - H_{\text{H}_2}^m(T_R, p_{\text{H}_2}^{\circ})] \quad (30)$$

$$B = [H_{\text{H}_2}^m(0\text{K}, p_{\text{H}_2}^{\circ}) - H_{\text{H}_2}^m(T_R, p_{\text{H}_2}^{\circ})] \quad (31)$$

$$C = TS_{\text{H}_2}^m(T, p_{\text{H}_2}^{\circ}) \quad (32)$$

The  $A$ ,  $B$ , and  $C$  values can be determined from thermodynamic tables.<sup>1</sup>

From the equation (6), (26), (28), and the approximation  $\frac{1}{2}E(\text{H}_2) = \mu_{\text{H}}(0\text{K}, p_{\text{H}_2}^{\circ})$  we obtain the equation determining the variation of chemical potential of oxygen,  $\Delta\mu_{\text{H}}$ , in

CaH<sub>2</sub> slab with temperate and oxygen pressure.

$$\Delta\mu_{\text{H}}(T, p_{\text{H}_2}) = \frac{1}{2} \left[ \Delta G_{\text{H}_2}^m(T, p_{\text{H}_2}^o) + k_B T \ln \frac{p_{\text{H}_2}}{p_{\text{H}_2}^o} \right] \quad (33)$$

### E. Surface nomenclature

In this section, we explain surface nomenclature and show atomic structures of (001), (110) and (111) surfaces. Symmetric slabs with all possible terminations were generated by axial scanning and cleaving the bulk crystal along [001], [110] and [111] crystallographic axes.

**Table S1: Surface nomenclature for (001)CaH<sub>2</sub>. Positive, negative, or zero  $\Gamma_{\text{Ca},H}^s$  indicates a hydrogen-rich (-*r*), hydrogen-poor (-*p*), or stoichiometric (-*s*) surface, respectively.**

| Name                        | Surface structure                                                                   |                                                                                     | $\Gamma_{\text{Ca},H}^s$ | Explanation                                                                                      |
|-----------------------------|-------------------------------------------------------------------------------------|-------------------------------------------------------------------------------------|--------------------------|--------------------------------------------------------------------------------------------------|
|                             | Side view                                                                           | Top view                                                                            |                          |                                                                                                  |
| CaH <sup>a</sup> - <i>p</i> | 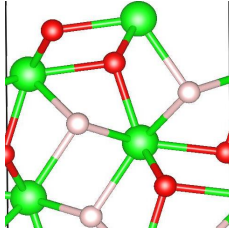 |  | -2                       | The top most layer is <b>Ca</b> ; the subsurface layer is <b>H<sup>a</sup></b> .                 |
| CaH <sup>b</sup> - <i>p</i> |  |  | -2                       | The top most layer is <b>Ca</b> ; the subsurface layer is <b>H<sup>b</sup></b> .                 |
| H <sup>a</sup> - <i>r</i>   |  |  | 2                        | The top most layer is <b>H<sup>a</sup></b> ; the subsurface layer is also <b>H<sup>a</sup></b> . |

...continued (001)CaH<sub>2</sub>

| Name      | Surface structure                                                                   |                                                                                     | $\Gamma_{Ca,H}^s$ | Explanation                                                                                      |
|-----------|-------------------------------------------------------------------------------------|-------------------------------------------------------------------------------------|-------------------|--------------------------------------------------------------------------------------------------|
|           | Side view                                                                           | Top view                                                                            |                   |                                                                                                  |
| $H^a - s$ | 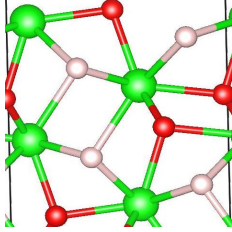   |    | 0                 | The top most layer is <b>H<sup>a</sup></b> ; the subsurface layer is <b>Ca</b> .                 |
| $H^b - r$ |   |   | 2                 | The top most layer is <b>H<sup>b</sup></b> ; the subsurface layer is also <b>H<sup>b</sup></b> . |
| $H^b - s$ |  |  | 0                 | The top most layer is <b>H<sup>b</sup></b> ; the subsurface layer is <b>Ca</b> .                 |

**Table S2: Surface nomenclature for (110)CaH<sub>2</sub>.** Positive, negative, or zero  $\Gamma_{\text{Ca},H}^s$  indicates a hydrogen-rich (-*r*), hydrogen-poor (-*p*), or stoichiometric (-*s*) surface, respectively.

| Name                             | Surface structure                                                                   |                                                                                     | $\Gamma_{\text{Ca},H}^s$ | Explanation                                                                                         |
|----------------------------------|-------------------------------------------------------------------------------------|-------------------------------------------------------------------------------------|--------------------------|-----------------------------------------------------------------------------------------------------|
|                                  | Side view                                                                           | Top view                                                                            |                          |                                                                                                     |
| Ca- <i>p</i>                     | 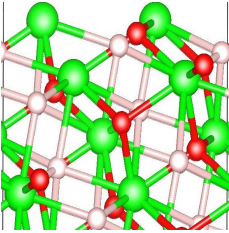   |    | -4                       | The top most layer is <b>Ca</b> .                                                                   |
| Ca- <i>s</i>                     |   |   | 0                        | The top most layer is <b>Ca</b> of lower concentration.                                             |
| H <sup><i>a</i></sup> - <i>p</i> |  |  | -2                       | The top most layer is <b>H<sup><i>a</i></sup></b> ; the subsurface layer is <b>Ca</b> .             |
| H <sup><i>a</i></sup> - <i>r</i> |  |  | 4                        | The top most layer is <b>H<sup><i>a</i></sup></b> ; the subsurface layer is H <sup><i>b</i></sup> . |

...continued (110)CaH<sub>2</sub>

| Name             | Surface structure |          | $\Gamma_{\text{Ca},H}^s$ | Explanation                                                                      |
|------------------|-------------------|----------|--------------------------|----------------------------------------------------------------------------------|
|                  | Side view         | Top view |                          |                                                                                  |
| $\text{H}^b - r$ |                   |          | 2                        | The top most layer is $\text{H}^b$ ; the subsurface layer is also $\text{H}^b$ . |
| $\text{H}^b - s$ |                   |          | 0                        | The top most layer is $\text{H}^b$ ; the subsurface layer is $\text{H}^a$ .      |

**Table S3: Surface nomenclature for (111)CaH<sub>2</sub>.** Positive, negative, or zero  $\Gamma_{\text{Ca},H}^s$  indicates a hydrogen-rich (-*r*), hydrogen-poor (-*p*), or stoichiometric (-*s*) surface, respectively.

| Name               | Surface structure |          | $\Gamma_{\text{Ca},H}^s$ | Explanation                                                                |
|--------------------|-------------------|----------|--------------------------|----------------------------------------------------------------------------|
|                    | Side view         | Top view |                          |                                                                            |
| $\text{CaH}^a - p$ |                   |          | -4                       | The top most layer is $\text{Ca}$ ; the subsurface layer is $\text{H}^a$ . |



...continued (111)CaH<sub>2</sub>

| Name             | Surface structure                                                                   |                                                                                     | $\Gamma_{Ca,H}^s$ | Explanation                                                                                                                                                    |
|------------------|-------------------------------------------------------------------------------------|-------------------------------------------------------------------------------------|-------------------|----------------------------------------------------------------------------------------------------------------------------------------------------------------|
|                  | Side view                                                                           | Top view                                                                            |                   |                                                                                                                                                                |
| $CaH^b - p$      | 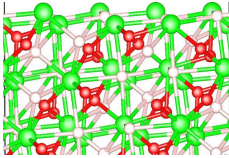   |    | -12               | The top most layer is <b>Ca</b> ; the subsurface layer is <b>H<sup>b</sup></b> .                                                                               |
| $H^a - p$        |   |   | -8                | The top most layer is <b>H<sup>a</sup></b> ; the subsurface layer is <b>Ca</b> .                                                                               |
| $H^a - s$        |  |  | 0                 | The top most layer is <b>H<sup>a</sup></b> ; the subsurface layers are <b>H<sup>b</sup></b> , <b>H<sup>a</sup></b> , and <b>Ca</b> , in that order.            |
| $\alpha-H^a - r$ |  |  | 12                | The top most layer is <b>H<sup>a</sup></b> ; the subsurface layers are <b>H<sup>b</sup></b> , <b>H<sup>a</sup></b> , and <b>H<sup>a</sup></b> , in that order. |

...continued (111)CaH<sub>2</sub>

| Name                    | Surface structure                                                                   |                                                                                     | $\Gamma_{Ca,H}^s$ | Explanation                                                                                                                    |
|-------------------------|-------------------------------------------------------------------------------------|-------------------------------------------------------------------------------------|-------------------|--------------------------------------------------------------------------------------------------------------------------------|
|                         | Side view                                                                           | Top view                                                                            |                   |                                                                                                                                |
| $\beta\text{-H}^a - r$  | 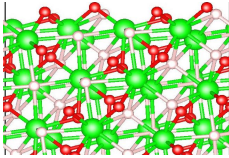   |    | 4                 | The top most layer is $\text{H}^a$ ; the subsurface layers are $\text{H}^a$ , $\text{H}^b$ , and $\text{H}^a$ , in that order. |
| $\text{H}^b - p$        |   |   | -4                | The top most layer is $\text{H}^b$ ; the subsurface layers are $\text{H}^a$ and $\text{Ca}$ .                                  |
| $\alpha\text{-H}^b - r$ |  |  | 4                 | The top most layer is $\text{H}^b$ ; the subsurface layer is $\text{Ca}$ .                                                     |
| $\beta\text{-H}^b - r$  |  |  | 8                 | The top most layer is $\text{H}^b$ ; the next two subsurface layers are $\text{H}^a$ .                                         |

## References

- (1) *JANAF Thermochemical Tables*, 3rd edition, by M. W. Chase, Jr., C. A. Davies, I. R. Downey, Jr., D. J. Frurip, R. A. McDonald, and A. N. Syverud, published by Am. Chem. Soc. and Am. Inst. Phys. for NBS (now NIST), Washington, DC (1986).
